# Supplementary material
Source: PubMed Central journal article supplement (PMC10111620)
Supplement: pt2c00222_si_001.pdf [file pt2c00222_si_001.pdf]

***Supporting Information:***

**Receptor binding profiles for tryptamine psychedelics and effects of 4-propionoxy-*N,N*-dimethyltryptamine in mice**

**Grant C. Glatfelter**<sup>1\*</sup>, Marilyn Naeem,<sup>2</sup> Duyen N. K. Pham<sup>2</sup>, James A. Golen<sup>2</sup>, Andrew R. Chadeayne<sup>3</sup>, David R. Manke<sup>2</sup>, Michael H. Baumann<sup>1</sup>

<sup>1</sup> Designer Drug Research Unit, National Institute on Drug Abuse, Intramural Research Program, Baltimore, MD, 21224 USA

<sup>2</sup> Department of Chemistry and Biochemistry, University of Massachusetts Dartmouth, North Dartmouth, MA 02747, USA

<sup>3</sup> CaaMTech, Inc., Issaquah, WA, 98027, USA

**\*Corresponding Author:**

Grant C. Glatfelter, Ph.D.

[grant.glatfelter@nih.gov](mailto:grant.glatfelter@nih.gov)

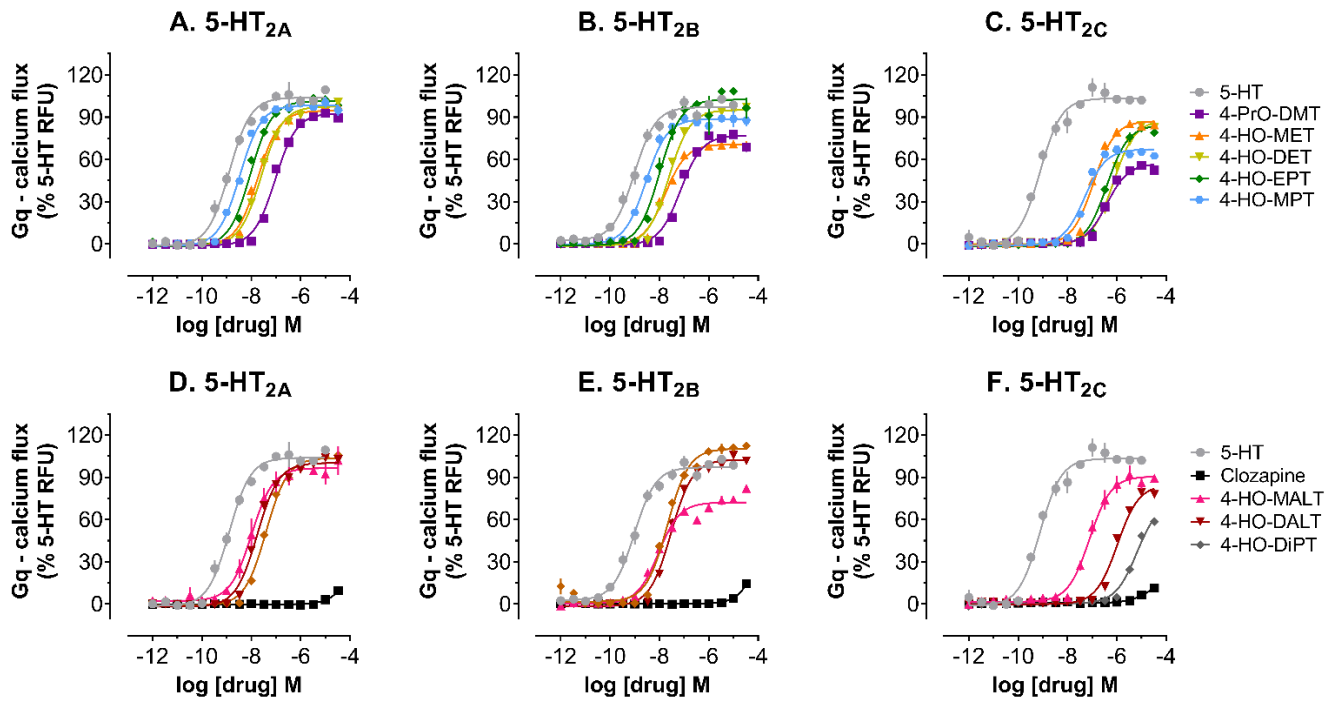

**Figure S1.** Concentration-response curves for agonist activity of 4-PrO-DMT and several other tryptamine psychedelics for G<sub>q</sub>-calcium mobilization at human 5-HT<sub>2</sub> receptors. All values are relative to 5-HT (% 5-HT relative fluorescence unit or RFU) and are mean ± SEM. Potency and efficacy values are shown in **Table S1**.

| Compound  | 5-HT <sub>2A</sub> G <sub>q</sub> -Calcium Mobilization |              |                           | 5-HT <sub>2B</sub> G <sub>q</sub> -Calcium Mobilization |             |                      | 5-HT <sub>2C</sub> G <sub>q</sub> -Calcium Mobilization |               |                      |
|-----------|---------------------------------------------------------|--------------|---------------------------|---------------------------------------------------------|-------------|----------------------|---------------------------------------------------------|---------------|----------------------|
|           | EC <sub>50</sub> (nM)                                   | 95% CI       | E <sub>max</sub> (% 5-HT) | EC <sub>50</sub> (nM)                                   | 95% CI      | E <sub>max</sub> (%) | EC <sub>50</sub> (nM)                                   | 95% CI (nM)   | E <sub>max</sub> (%) |
| 4-PrO-DMT | 93.4                                                    | 81.8 - 106.7 | 92.8                      | 71.5                                                    | 58.7 - 87.1 | 76.9                 | 390.3                                                   | 320.8 - 474.9 | 56.9                 |
| 4-HO-MET  | 18.3                                                    | 15.9 - 21.1  | 94.6                      | 16.7                                                    | 14.4 - 19.4 | 70.7                 | 112.9                                                   | 95.8 - 133.0  | 87.2                 |
| 4-HO-DET  | 25.4                                                    | 22.4 - 28.7  | 97.5                      | 23.8                                                    | 20.7 - 27.2 | 95.1                 | 729.3                                                   | 623.5 - 853.1 | 87.7                 |
| 4-HO-EPT  | 9.3                                                     | 7.9 - 10.9   | 101.4                     | 10.3                                                    | 7.6 - 13.9  | 102.4                | 393.3                                                   | 331.5 - 466.7 | 84.4                 |
| 4-HO-MPT  | 3.4                                                     | 2.9 - 3.9    | 98.4                      | 2.8                                                     | 2.3 - 3.4   | 88.7                 | 49.8                                                    | 40.1 - 61.9   | 67.2                 |
| 4-HO-MALT | 10.2                                                    | 7.0 - 15.0   | 96.5                      | 9.1                                                     | 7.1 - 11.7  | 72.1                 | 77.7                                                    | 59.6 - 101.4  | 90.6                 |
| 4-HO-DALT | 17.4                                                    | 15.0 - 20.0  | 100.2                     | 29.6                                                    | 25.8 - 33.9 | 102.4                | 1,051                                                   | 888.0 - 1,244 | 84.5                 |
| 4-HO-DiPT | 39.8                                                    | 35.4 - 44.7  | 103.7                     | 20.9                                                    | 17.1 - 25.6 | 110.2                | 6,442                                                   | 5,335 - 7,777 | 72.4                 |
| Clozapine | > 10,000                                                | x            | x                         | >10,000                                                 | x           | x                    | >10,000                                                 | x             | x                    |

**Table S1.** Agonist potency (EC<sub>50</sub> & 95% CI) and efficacy (E<sub>max</sub>) of 4-PrO-DMT and several other tryptamine psychedelics for G<sub>q</sub>-calcium mobilization at human 5-HT<sub>2</sub> receptors relative to 5-HT. Concentration-response curves are depicted in **Figure S1** and details for the assays can be found online at <https://pdsp.unc.edu/pdspweb/content/UNC-CH%20Protocol%20Book.pdf>. All values are normalized to % 5-HT response. 5-HT displayed EC<sub>50</sub> values = 1.3, 0.9, and 0.8 nM for 5-HT<sub>2A</sub>, 5-HT<sub>2B</sub>, and 5-HT<sub>2C</sub> respectively. Data represent 1 – 2 experiments with triplicate determinations.

| Drug      | Dose<br>(mg/kg) | HTR count<br>(mean ± SEM) | Post Test<br><i>p</i> value | Temperature<br>Change<br>(mean ± SEM) | Post Test<br><i>p</i> value | Locomotor<br>Activity<br>(mean ± SEM) | Post Test<br><i>p</i> value |
|-----------|-----------------|---------------------------|-----------------------------|---------------------------------------|-----------------------------|---------------------------------------|-----------------------------|
| 4-PrO-DMT | 0               | 7.2 ± 1.1                 | -                           | -0.5 ± 0.1                            | -                           | 2,953 ± 206                           | -                           |
|           | 0.03            | 5.2 ± 0.6                 | 0.9507                      | -0.5 ± 0.1                            | 0.9999                      | 2,432 ± 216                           | 0.4451                      |
|           | 0.1             | 9.2 ± 0.2                 | 0.9576                      | -0.5 ± 0.2                            | > 0.9999                    | 2,837 ± 243                           | 0.9995                      |
|           | 0.3             | <b>15.5 ± 1.7</b>         | <b>0.0132</b>               | -0.7 ± 0.2                            | 0.9979                      | 3,018 ± 315                           | 0.9997                      |
|           | 1               | <b>30.4 ± 2.1</b>         | <b>&lt; 0.0001</b>          | -0.9 ± 0.1                            | 0.9250                      | 2,927 ± 270                           | > 0.9999                    |
|           | 3               | <b>23.2 ± 3.7</b>         | <b>&lt; 0.0001</b>          | <b>-2.2 ± 0.3</b>                     | <b>0.0089</b>               | <b>1,911 ± 301</b>                    | <b>0.0219</b>               |
|           | 10              | 9.0 ± 2.5                 | 0.9748                      | <b>-3.8 ± 0.6</b>                     | <b>&lt; 0.0001</b>          | <b>1,032 ± 211</b>                    | <b>&lt; 0.0001</b>          |
|           | 30              | 5.5 ± 1.4                 | 0.9804                      | <b>-7.3 ± 0.7</b>                     | <b>&lt; 0.0001</b>          | <b>404 ± 67</b>                       | <b>&lt; 0.0001</b>          |

**Table S2.** Mean ± SEM ( $n = 5 - 6$ ) and post hoc test comparisons for dose-response effects of 4-PrO-DMT to produce HTR (count/30 min), hypothermia (°C), and hypolocomotion (distance traveled cm) in mice. Extension of **Figures 2 and 3**. Bold values are statistically significant values vs. vehicle control (0 mg/kg) and other relevant statistical information can be found in the **Materials and Methods** section. Overall  $F$ -test values were  $F_{7,36} = 23.28$   $p < 0.0001$ ,  $F_{7,36} = 46.52$   $p < 0.0001$ , and  $F_{7,36} = 18.02$   $p < 0.0001$  for HTR, temperature change, and locomotor activity comparisons respectively.

| <b>Drug</b> | <b>Dose<br/>M100907 /<br/>Drug<br/>(mg/kg)</b> | <b>HTR count<br/>(mean ± SEM)</b> | <b>Temperature<br/>Change<br/>(mean ± SEM)</b> | <b>Locomotor<br/>Activity<br/>(mean ± SEM)</b> |
|-------------|------------------------------------------------|-----------------------------------|------------------------------------------------|------------------------------------------------|
| 4-PrO-DMT   | 0 / 0                                          | 5.0 ± 2.0                         | -0.6 ± 0.2                                     | 4,075 ± 538                                    |
|             | 0.01 / 0                                       | 1.0 ± 0.5                         | -0.02 ± 0.1                                    | 3,140 ± 302                                    |
|             | 0 / 0.6                                        | 18 ± 1.2                          | -0.3 ± 0.2                                     | 3,941 ± 510                                    |
|             | 0.01 / 0.6                                     | 1.0 ± 0.4                         | -0.1 ± 0.1                                     | 3,108 ± 485                                    |

**Table S3.** Mean ± SEM ( $n = 5 - 6$ ) for 5-HT<sub>2A</sub> antagonist pretreatment effects of M100907 on HTR (count/30 min), temperature change (°C), and locomotor activity (distance traveled cm) induced by 4-PrO-DMT. Extension of **Figure 4A** and **Figure S2A – B**.

| Groups Compared         | HTR          |         | Temperature Change |         | Locomotor Activity |         |                |
|-------------------------|--------------|---------|--------------------|---------|--------------------|---------|----------------|
|                         | Tukey's Test | Summary | <i>p</i> value     | Summary | <i>p</i> value     | Summary | <i>p</i> value |
| 0 / 0 vs. 0.01 / 0      |              | ns      | 0.1390             | ns      | 0.0783             | ns      | 0.5611         |
| 0 / 0 vs. 0.01 / 0.6    |              | ns      | 0.1159             | ns      | 0.4052             | ns      | 0.9972         |
| 0 / 0 vs. 0 / 0.6       |              | *       | <b>&lt; 0.0001</b> | ns      | 0.0814             | ns      | 0.4987         |
| 0.01 / 0 vs. 0.01 / 0.6 |              | ns      | > 0.9999           | ns      | 0.6855             | ns      | 0.6439         |
| 0.01 / 0 vs. 0 / 0.6    |              | *       | <b>&lt; 0.0001</b> | ns      | 0.9991             | ns      | > 0.9999       |
| 0.01 / 0.6 vs. 0 / 0.6  |              | *       | <b>&lt; 0.0001</b> | ns      | 0.7363             | ns      | 0.5796         |

**Table S4.** Post hoc test comparisons for M100907 pretreatment on effects of 4-PrO-DMT. Extension of **Figure 4A** and **Figure S2A – B**. Bold values are statistically significant values. Overall *F*-test values were  $F_{3,18} = 49.45$   $p < 0.0001$ ,  $F_{3,18} = 2.95$   $p = 0.0604$ , and  $F_{3,18} = 1.15$   $p = 0.3562$  for HTR, temperature change, and locomotor activity comparisons respectively.

| Drug      | Dose<br>WAY100635 /<br>Drug<br>(mg/kg) | HTR count<br>(mean ± SEM) | Temperature<br>Change<br>(mean ± SEM) | Locomotor<br>Activity<br>(mean ± SEM) |
|-----------|----------------------------------------|---------------------------|---------------------------------------|---------------------------------------|
| 4-PrO-DMT | 0 / 0                                  | 3.0 ± 1.2                 | -0.3 ± 0.1                            | 1,760 ± 351                           |
|           | 3 / 0                                  | 3.0 ± 0.5                 | -0.2 ± 0.1                            | 1,607 ± 371                           |
|           | 0 / 10                                 | 8.2 ± 3.1                 | -4.1 ± 0.7                            | 687 ± 163                             |
|           | 3 / 10                                 | 25.2 ± 2.7                | -2.0 ± 0.3                            | 1,331 ± 267                           |

**Table S5.** Mean ± SEM ( $n = 5 - 6$ ) for 5-HT<sub>1A</sub> antagonist pretreatment effects of WAY100635 on HTR (count/30 min), temperature change (°C), and locomotor activity (distance traveled cm) induced by 4-PrO-DMT. Extension of **Figure 4B – C** and **Figure S2D**.

| Groups Compared   | HTR          |         | Temperature Change |         | Locomotor Activity |         |                |
|-------------------|--------------|---------|--------------------|---------|--------------------|---------|----------------|
|                   | Tukey's Test | Summary | <i>p</i> value     | Summary | <i>p</i> value     | Summary | <i>p</i> value |
| 0 / 0 vs. 3 / 0   | ns           |         | > 0.9999           | ns      | 0.9996             | ns      | 0.9837         |
| 0 / 0 vs. 0 / 10  | ns           |         | 0.4411             | *       | <b>&lt; 0.0001</b> | ns      | 0.0733         |
| 0 / 0 vs. 3 / 10  | *            |         | <b>&lt; 0.0001</b> | *       | <b>0.0345</b>      | ns      | 0.7222         |
| 3 / 0 vs. 0 / 10  | ns           |         | 0.4411             | *       | <b>&lt; 0.0001</b> | ns      | 0.1461         |
| 3 / 0 vs. 3 / 10  | *            |         | <b>&lt; 0.0001</b> | *       | <b>0.0280</b>      | ns      | 0.9045         |
| 0 / 10 vs. 3 / 10 | *            |         | <b>0.0003</b>      | *       | <b>0.0074</b>      | ns      | 0.3745         |

**Table S6.** Post hoc test comparisons for WAY100635 pretreatment on effects of 4-PrO-DMT. Extension of **Figure 4B – C** and **Figure S2D**. Bold values are statistically significant values. Overall *F*-test values were  $F_{3,18} = 20.22$   $p < 0.0001$ ,  $F_{3,18} = 20.33$   $p < 0.0001$ , and  $F_{3,18} = 2.78$   $p = 0.0709$  for HTR, temperature change, and locomotor activity comparisons respectively



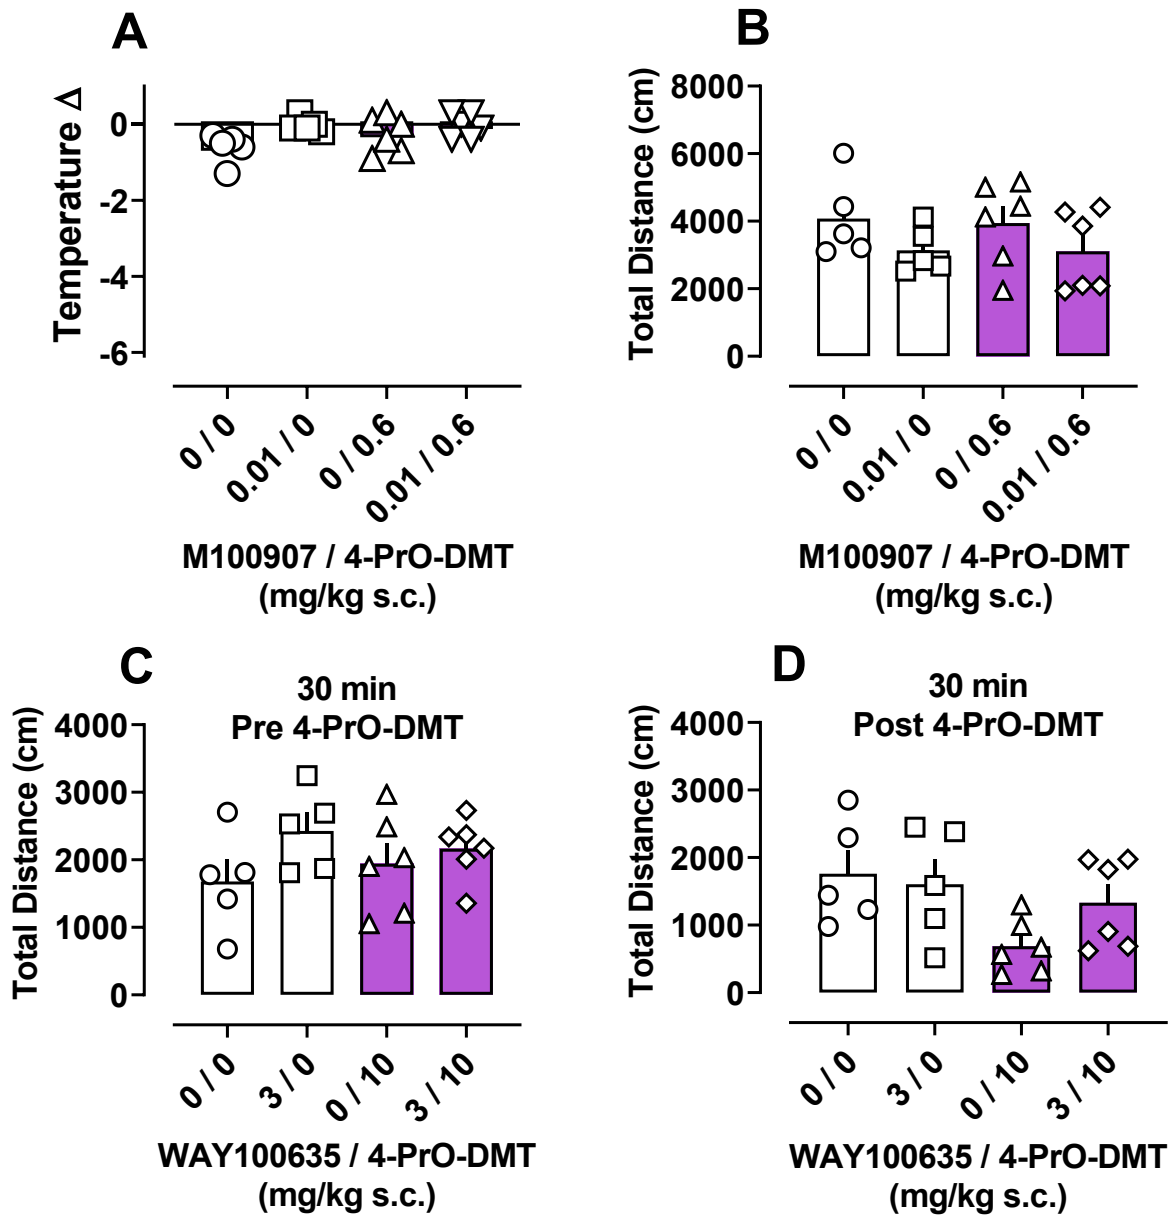

**Figure S2.** Effects of M100907 or WAY100635 pretreatment on body temperature ( $^{\circ}\text{C}$ ) and locomotor activity (distance traveled cm). (A) Temperature change for the 30 min session after 4-PrO-DMT administration. (B) Distance traveled over the full 60-minute session from M100907 administration through the end of the session (30 min after 4-PrO-DMT). (C) Effects of WAY100635 or vehicle pretreatment on locomotor activity. (D) Effects of vehicle or 4-PrO-DMT treatment on locomotor activity in WAY100635 or vehicle treated mice.

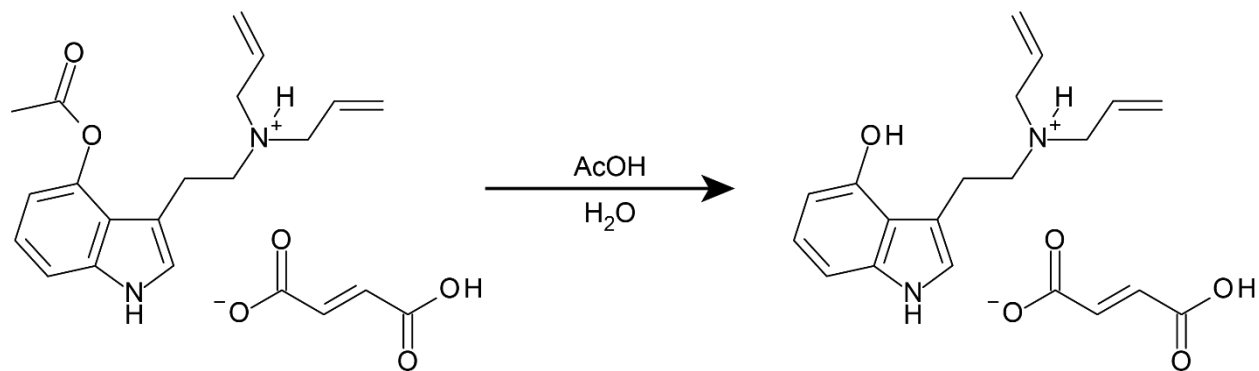

### Synthesis and crystallization of 4-HO-DALT hydrofumarate

150 mg (1mmol) of 4-acetoxy-*N,N*-diallyltryptammonium hydrofumarate was dissolved in 1.0 mL of water, and an excess of acetic acid (6.0 mL) was added. The mixture was refluxed overnight under an atmosphere of nitrogen. Solvent was removed *in vacuo*, and acetone was added and filtered. Solvent was removed *in vacuo* from the filtrate to obtain yellow oil. The oil was triturated with pentane to produce a solid which was recrystallized in acetone/pentane mixture to yield a crystalline product.

$^1\text{H}$  NMR (400 MHz,  $\text{D}_2\text{O}$ ):  $\delta$  7.19 (s, 1H, ArH), 7.08 (m, 1H, ArH), 6.63 (s, 1H, CH), 6.55 (dd,  $J = 6.1, 2.3$  Hz, 1H, ArH), 5.98 – 5.74 (m, 2H, CH), 5.61-5.54 (m, 4H,  $\text{CH}_2$ ), 3.82 (d,  $J = 7.1$  Hz, 4H,  $\text{CH}_2$ ), 3.55 (t,  $J = 7.4$  Hz, 2H,  $\text{CH}_2$ ), 3.30 (t,  $J = 7.5$  Hz, 2H,  $\text{CH}_2$ ).

**Figure S3.** Fully labelled displacement ellipsoid representation (50%) of 4-PrO-DMT hydrofumurate

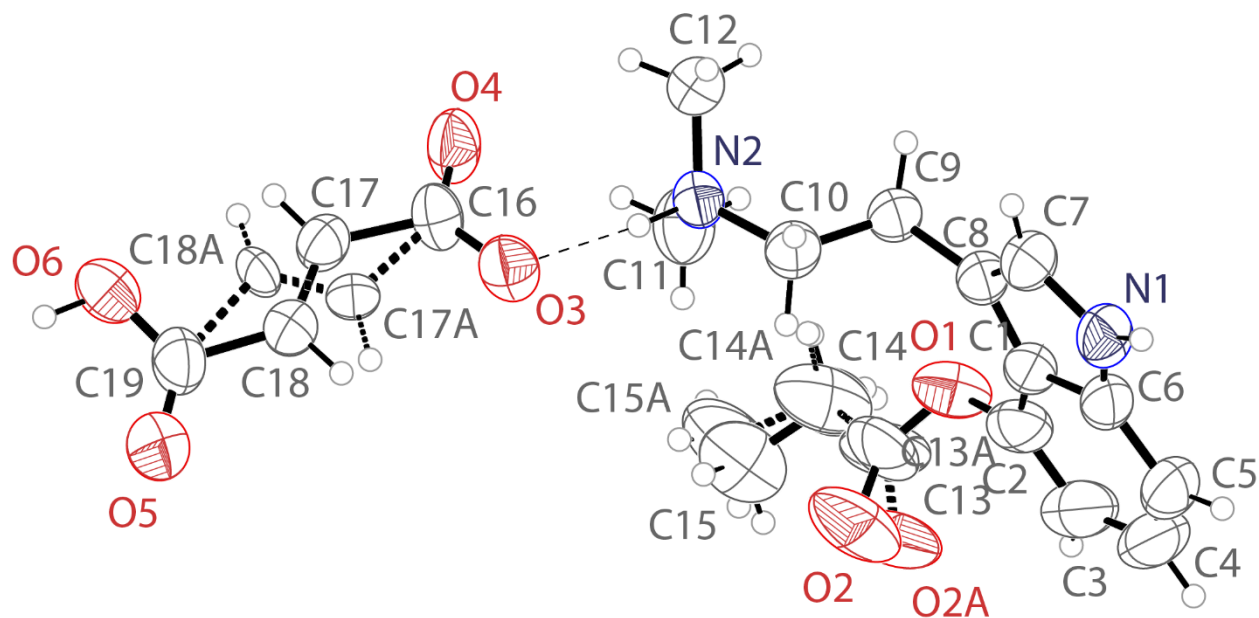

**X-Ray data collection and refinement details for 4-PrO-DMT hydrofumurate.** Crystals suitable for X-ray diffraction studies were grown from the slow evaporation of an aqueous solution. All operations were performed on a Bruker D8 Venture CMOS diffractometer, using MoK $\alpha$  radiation with a TRIUMPH monochromator. Data collection was carried out using the Bruker *APEX3* software. Cell refinement and data reduction were performed with the *SAINT* program.<sup>1</sup> The structure solution was done with the *SHELXT2014*<sup>2</sup> and structure refinement was performed with *SHELXL2018*.<sup>3</sup> Further refinement and molecular graphics were generated using the *OLEX2* software.<sup>4</sup>

The asymmetric unit contained one protonated tryptammonium cation and one singly protonated hydrofumurate anion. All non-hydrogen atoms were refined anisotropically (XL) by full matrix least squares on  $F^2$ . H1, H2 and H6 were found from a Fourier difference map. H1 and H2 refined freely with isotropic displacement parameters of 1.20 times  $U_{eq}$  of the parent N atoms. H6 was refined with a fixed distance of 0.90 (0.01) Å and an isotropic displacement parameter of 1.50 times  $U_{eq}$  of the parent O atom. All other hydrogen atoms were placed in calculated positions with a riding model with C–H lengths of 0.93 Å ( $sp^2$ ), 0.96 Å (CH<sub>3</sub>), and 0.97 Å (CH<sub>2</sub>) with isotropic displacement parameters set to 1.20 ( $sp^2$  and CH<sub>2</sub>), and 1.50 (CH<sub>3</sub>) times  $U_{eq}$  of the parent C atom. The propionoxy group (O2, C13, C14, C15) are modeled as a two-component disorder with a 0.51(3) to 0.49(3) occupancy ratio. C17 and C18 of the hydrofumurate anion are also modeled as a two-component disorder with a 0.826(8) to 0.174(8) occupancy ratio. Further details are in the tables below, and final CIF is available as supporting material.

**Table S7.** Crystal data, data collection and refinement for 4-PrO-DMT hydrofumurate

|                                                                |                                                                                     |
|----------------------------------------------------------------|-------------------------------------------------------------------------------------|
| $C_{15}H_{21}N_2O_2 \cdot C_4H_3O_4$                           | $F(000) = 800$                                                                      |
| $M_r = 376.40$                                                 | $D_x = 1.274 \text{ Mg m}^{-3}$                                                     |
| Monoclinic, $P2_1/n$                                           | Mo $K\alpha$ radiation, $\lambda = 0.71073 \text{ \AA}$                             |
| Hall symbol: $-P 2_1n$                                         | Cell parameters from 9336 reflections                                               |
| $a = 11.7169 (19) \text{ \AA}$                                 | $\Theta = 2.6\text{--}24.7^\circ$                                                   |
| $b = 11.4642 (16) \text{ \AA}$                                 | $\mu = 0.10 \text{ mm}^{-1}$                                                        |
| $c = 15.287 (2) \text{ \AA}$                                   | $T = 297 \text{ K}$                                                                 |
| $\beta = 107.076 (5)^\circ$                                    | Block, colourless                                                                   |
| $V = 1963.0 (5) \text{ \AA}^3$                                 | $0.28 \times 0.22 \times 0.18 \text{ mm}$                                           |
| $Z = 4$                                                        |                                                                                     |
| Bruker D8 Venture CMOS diffractometer                          | 2649 reflections with $I > 2\sigma(I)$                                              |
| Radiation source: Mo $K\alpha$                                 | $R_{\text{int}} = 0.041$                                                            |
| $\varphi$ and $\omega$ scans                                   | $\Theta_{\text{max}} = 25.4^\circ$ , $\Theta_{\text{min}} = 2.6^\circ$              |
| Absorption correction: multi-scan SADABS2016/2 (Bruker,2016/2) | $h = -14 \rightarrow 14$                                                            |
| $T_{\text{min}} = 0.701$ , $T_{\text{max}} = 0.745$            | $k = -13 \rightarrow 13$                                                            |
| 37620 measured reflections                                     | $l = -18 \rightarrow 18$                                                            |
| 3543 independent reflections                                   |                                                                                     |
| Refinement on $F^2$                                            | 74 restraints                                                                       |
| Least-squares matrix: full                                     | Hydrogen site location: mixed                                                       |
| $R[F^2 > 2\sigma(F^2)] = 0.050$                                | H atoms treated by a mixture of independent and constrained refinement              |
| $wR(F^2) = 0.147$                                              | $w = 1/[\sigma^2(F_o^2) + (0.0695P)^2 + 0.5927P]$<br>where $P = (F_o^2 + 2F_c^2)/3$ |
| $S = 1.03$                                                     | $(\Delta/\sigma)_{\text{max}} = 0.001$                                              |
| 3543 reflections                                               | $\Delta\rho_{\text{max}} = 0.22 \text{ e \AA}^{-3}$                                 |
| 316 parameters                                                 | $\Delta\rho_{\text{min}} = -0.22 \text{ e \AA}^{-3}$                                |

**Table S8.** Fractional atomic coordinates and isotropic or equivalent isotropic displacement parameters ( $\text{\AA}^2$ ) for 4-PrO-DMT hydrofumarate

|      | x               | y               | z               | $U_{\text{iso}}^*/U_{\text{eq}}$ | Occ. (<1) |
|------|-----------------|-----------------|-----------------|----------------------------------|-----------|
| O1   | 0.40448<br>(14) | 0.57590<br>(16) | 0.32665<br>(11) | 0.0810 (5)                       |           |
| N1   | 0.1589 (2)      | 0.83715<br>(15) | 0.41522<br>(13) | 0.0705 (5)                       |           |
| H1   | 0.129 (2)       | 0.895 (2)       | 0.4345 (18)     | 0.086 (8)*                       |           |
| N2   | 0.14531<br>(15) | 0.32863<br>(14) | 0.41927<br>(12) | 0.0586 (4)                       |           |
| H2   | 0.158 (2)       | 0.295 (2)       | 0.4791 (18)     | 0.083 (7)*                       |           |
| C1   | 0.28354<br>(17) | 0.71444<br>(17) | 0.37490<br>(12) | 0.0568 (5)                       |           |
| C2   | 0.39301<br>(19) | 0.6874 (2)      | 0.36085<br>(14) | 0.0692 (6)                       |           |
| C3   | 0.4812 (2)      | 0.7703 (3)      | 0.37387<br>(17) | 0.0906 (8)                       |           |
| H3   | 0.553898        | 0.751172        | 0.364522        | 0.109*                           |           |
| C4   | 0.4624 (3)      | 0.8824 (3)      | 0.40086<br>(19) | 0.1006 (10)                      |           |
| H4   | 0.523129        | 0.937300        | 0.409170        | 0.121*                           |           |
| C5   | 0.3580 (3)      | 0.9142 (2)      | 0.41550<br>(17) | 0.0880 (8)                       |           |
| H5   | 0.346121        | 0.989897        | 0.432877        | 0.106*                           |           |
| C6   | 0.2690 (2)      | 0.82949<br>(17) | 0.40362<br>(13) | 0.0655 (6)                       |           |
| C7   | 0.10251<br>(19) | 0.73193<br>(17) | 0.39438<br>(14) | 0.0643 (5)                       |           |
| H7   | 0.025895        | 0.715878        | 0.397265        | 0.077*                           |           |
| C8   | 0.17447<br>(17) | 0.65386<br>(16) | 0.36875<br>(12) | 0.0551 (5)                       |           |
| C9   | 0.14375<br>(18) | 0.52806<br>(16) | 0.34490<br>(13) | 0.0564 (5)                       |           |
| H9A  | 0.193137        | 0.497877        | 0.309063        | 0.068*                           |           |
| H9B  | 0.060829        | 0.521695        | 0.308578        | 0.068*                           |           |
| C10  | 0.1645 (2)      | 0.45781<br>(16) | 0.43202<br>(13) | 0.0632 (5)                       |           |
| H10A | 0.245827        | 0.471098        | 0.469742        | 0.076*                           |           |
| H10B | 0.111702        | 0.487132        | 0.465363        | 0.076*                           |           |

|      |                 |                  |                 |             |          |
|------|-----------------|------------------|-----------------|-------------|----------|
| C11  | 0.2316 (2)      | 0.2727 (2)       | 0.37879<br>(19) | 0.0841 (7)  |          |
| H11A | 0.311441        | 0.290825         | 0.415186        | 0.126*      |          |
| H11B | 0.219263        | 0.301247         | 0.317671        | 0.126*      |          |
| H11C | 0.220265        | 0.189715         | 0.377223        | 0.126*      |          |
| C12  | 0.0209 (2)      | 0.2982 (2)       | 0.36825<br>(18) | 0.0798 (7)  |          |
| H12A | -0.032912       | 0.336506         | 0.395690        | 0.120*      |          |
| H12B | 0.010338        | 0.215258         | 0.370147        | 0.120*      |          |
| H12C | 0.004435        | 0.322970         | 0.305790        | 0.120*      |          |
| O2   | 0.5514 (16)     | 0.5240 (16)      | 0.4480 (5)      | 0.122 (5)   | 0.51 (3) |
| C13  | 0.4947 (10)     | 0.5094 (10)      | 0.3682 (6)      | 0.093 (4)   | 0.51 (3) |
| C14  | 0.5003 (12)     | 0.4030 (11)      | 0.3144 (7)      | 0.087 (4)   | 0.51 (3) |
| H14A | 0.524775        | 0.423417         | 0.261012        | 0.104*      | 0.51 (3) |
| H14B | 0.422037        | 0.366943         | 0.293741        | 0.104*      | 0.51 (3) |
| C15  | 0.589 (2)       | 0.3189 (18)      | 0.3737 (12)     | 0.110 (4)   | 0.51 (3) |
| H15A | 0.582598        | 0.244987         | 0.343168        | 0.165*      | 0.51 (3) |
| H15B | 0.571478        | 0.309034         | 0.430902        | 0.165*      | 0.51 (3) |
| H15C | 0.667962        | 0.349186         | 0.384704        | 0.165*      | 0.51 (3) |
| O2A  | 0.5875 (11)     | 0.5544 (10)      | 0.4158 (18)     | 0.144 (5)   | 0.49 (3) |
| C13A | 0.4988 (7)      | 0.5095 (11)      | 0.3644 (8)      | 0.092 (4)   | 0.49 (3) |
| C14A | 0.4959 (13)     | 0.3945 (12)      | 0.3186 (10)     | 0.111 (5)   | 0.49 (3) |
| H14C | 0.514299        | 0.409356         | 0.261694        | 0.134*      | 0.49 (3) |
| H14D | 0.413764        | 0.367888         | 0.301955        | 0.134*      | 0.49 (3) |
| C15A | 0.572 (2)       | 0.293 (2)        | 0.3633 (16)     | 0.147 (8)   | 0.49 (3) |
| H15D | 0.564938        | 0.231686         | 0.319431        | 0.220*      | 0.49 (3) |
| H15E | 0.545630        | 0.265547         | 0.413425        | 0.220*      | 0.49 (3) |
| H15F | 0.653711        | 0.317620         | 0.385591        | 0.220*      | 0.49 (3) |
| O3   | 0.19066<br>(14) | 0.20109<br>(13)  | 0.57933 (9)     | 0.0733 (4)  |          |
| O4   | 0.12423<br>(17) | 0.05871<br>(12)  | 0.48175<br>(11) | 0.0851 (5)  |          |
| O5   | 0.35860<br>(18) | -0.04667<br>(16) | 0.86211<br>(13) | 0.0957 (6)  |          |
| O6   | 0.23761<br>(17) | -0.17353<br>(17) | 0.77237<br>(11) | 0.0926 (6)  |          |
| H6   | 0.260 (3)       | -0.219 (2)       | 0.8218 (15)     | 0.127 (11)* |          |

|      |                 |                 |                 |            |           |
|------|-----------------|-----------------|-----------------|------------|-----------|
| C16  | 0.16768<br>(19) | 0.09418<br>(17) | 0.55962<br>(14) | 0.0611 (5) |           |
| C19  | 0.2894 (2)      | -0.0703 (2)     | 0.79104<br>(17) | 0.0706 (6) |           |
| C17  | 0.1922 (3)      | 0.0009 (3)      | 0.6339 (2)      | 0.0592 (9) | 0.826 (8) |
| H17  | 0.158958        | -0.072678       | 0.618462        | 0.071*     | 0.826 (8) |
| C18  | 0.2564 (2)      | 0.0188 (3)      | 0.7167 (2)      | 0.0619 (9) | 0.826 (8) |
| H18  | 0.284822        | 0.094145        | 0.731726        | 0.074*     | 0.826 (8) |
| C17A | 0.2348 (12)     | 0.0563 (12)     | 0.6596 (11)     | 0.057 (4)  | 0.174 (8) |
| H17A | 0.278819        | 0.108896        | 0.702749        | 0.068*     | 0.174 (8) |
| C18A | 0.2257 (11)     | -0.0517 (11)    | 0.6787 (9)      | 0.058 (4)  | 0.174 (8) |
| H18A | 0.189790        | -0.109632       | 0.637187        | 0.070*     | 0.174 (8) |

**Table S9.** Atomic displacement parameters ( $\text{\AA}^2$ ) for 4-PrO-DMT hydrofumarate

|    | $U^{11}$       | $U^{22}$       | $U^{33}$       | $U^{12}$     | $U^{13}$    | $U^{23}$        |
|----|----------------|----------------|----------------|--------------|-------------|-----------------|
| O1 | 0.0650<br>(10) | 0.1046<br>(13) | 0.0646 (9)     | 0.0033 (8)   | 0.0054 (7)  | -0.0184 (9)     |
| N1 | 0.0909<br>(14) | 0.0454<br>(10) | 0.0686<br>(11) | 0.0010 (9)   | 0.0132 (10) | -0.0056 (8)     |
| N2 | 0.0654<br>(10) | 0.0498 (9)     | 0.0557 (9)     | 0.0009 (7)   | 0.0104 (8)  | 0.0064 (7)      |
| C1 | 0.0659<br>(12) | 0.0569<br>(11) | 0.0409 (9)     | -0.0100 (9)  | 0.0054 (8)  | 0.0013 (8)      |
| C2 | 0.0675<br>(13) | 0.0868<br>(15) | 0.0465<br>(10) | -0.0127 (11) | 0.0061 (9)  | -0.0044<br>(10) |
| C3 | 0.0742<br>(15) | 0.127 (2)      | 0.0662<br>(14) | -0.0320 (15) | 0.0143 (12) | -0.0030<br>(15) |
| C4 | 0.103 (2)      | 0.109 (2)      | 0.0778<br>(17) | -0.0554 (18) | 0.0078 (15) | -0.0009<br>(16) |
| C5 | 0.116 (2)      | 0.0656<br>(14) | 0.0684<br>(14) | -0.0315 (14) | 0.0044 (14) | 0.0016 (11)     |
| C6 | 0.0832<br>(15) | 0.0525<br>(11) | 0.0506<br>(11) | -0.0138 (10) | 0.0039 (10) | 0.0014 (8)      |
| C7 | 0.0719<br>(13) | 0.0502<br>(11) | 0.0676<br>(12) | -0.0022 (9)  | 0.0153 (10) | -0.0031 (9)     |
| C8 | 0.0644<br>(11) | 0.0470<br>(10) | 0.0484<br>(10) | -0.0037 (8)  | 0.0082 (8)  | -0.0004 (8)     |
| C9 | 0.0649<br>(11) | 0.0489<br>(10) | 0.0508<br>(10) | -0.0055 (8)  | 0.0095 (8)  | -0.0040 (8)     |

|      |                |                |                |              |             |                 |
|------|----------------|----------------|----------------|--------------|-------------|-----------------|
| C10  | 0.0802<br>(13) | 0.0528<br>(11) | 0.0506<br>(10) | -0.0071 (9)  | 0.0097 (9)  | -0.0037 (9)     |
| C11  | 0.0933<br>(17) | 0.0659<br>(14) | 0.0995<br>(18) | 0.0157 (12)  | 0.0385 (14) | 0.0080 (13)     |
| C12  | 0.0716<br>(14) | 0.0616<br>(13) | 0.0915<br>(16) | -0.0097 (11) | 0.0010 (12) | 0.0118 (11)     |
| O2   | 0.130 (7)      | 0.148 (8)      | 0.062 (4)      | 0.040 (5)    | -0.011 (3)  | -0.019 (3)      |
| C13  | 0.105 (9)      | 0.107 (7)      | 0.046 (5)      | 0.009 (6)    | -0.010 (5)  | 0.005 (5)       |
| C14  | 0.082 (7)      | 0.137 (9)      | 0.051 (5)      | -0.008 (6)   | 0.034 (5)   | -0.002 (4)      |
| C15  | 0.123 (8)      | 0.115 (7)      | 0.089 (6)      | 0.032 (5)    | 0.025 (6)   | -0.027 (5)      |
| O2A  | 0.087 (5)      | 0.154 (5)      | 0.142 (11)     | -0.003 (4)   | -0.043 (5)  | 0.007 (6)       |
| C13A | 0.035 (5)      | 0.140 (9)      | 0.097 (9)      | 0.011 (5)    | 0.014 (4)   | -0.020 (7)      |
| C14A | 0.069 (8)      | 0.138 (9)      | 0.117 (10)     | 0.043 (7)    | 0.011 (6)   | -0.038 (7)      |
| C15A | 0.136 (11)     | 0.143 (12)     | 0.125 (11)     | 0.056 (11)   | -0.018 (8)  | -0.002 (9)      |
| O3   | 0.1015<br>(11) | 0.0614 (9)     | 0.0510 (8)     | 0.0062 (8)   | 0.0131 (7)  | -0.0061 (6)     |
| O4   | 0.1360<br>(15) | 0.0464 (8)     | 0.0652<br>(10) | -0.0005 (8)  | 0.0176 (9)  | 0.0013 (7)      |
| O5   | 0.1027<br>(13) | 0.0877<br>(12) | 0.0841<br>(12) | -0.0121 (10) | 0.0078 (10) | 0.0171 (10)     |
| O6   | 0.1065<br>(13) | 0.1025<br>(14) | 0.0533 (9)     | -0.0144 (11) | -0.0007 (9) | 0.0144 (9)      |
| C16  | 0.0771<br>(13) | 0.0510<br>(11) | 0.0580<br>(12) | 0.0140 (9)   | 0.0240 (10) | 0.0072 (9)      |
| C19  | 0.0728<br>(14) | 0.0689<br>(14) | 0.0734<br>(15) | 0.0034 (11)  | 0.0267 (12) | 0.0212 (12)     |
| C17  | 0.0718<br>(19) | 0.0467<br>(16) | 0.0567<br>(19) | -0.0087 (15) | 0.0148 (14) | -0.0021<br>(16) |
| C18  | 0.0669<br>(16) | 0.0538<br>(17) | 0.060 (2)      | -0.0065 (13) | 0.0099 (13) | 0.0028 (16)     |
| C17A | 0.062 (8)      | 0.050 (8)      | 0.045 (8)      | -0.012 (6)   | -0.003 (6)  | -0.004 (6)      |
| C18A | 0.076 (8)      | 0.047 (8)      | 0.034 (6)      | -0.004 (6)   | -0.011 (5)  | 0.011 (6)       |

**Table S10.** Geometric parameters (Å, °) for 4-PrO-DMT hydrofumarate

|         |           |          |            |
|---------|-----------|----------|------------|
| O1—C2   | 1.402 (3) | C12—H12C | 0.9600     |
| O1—C13  | 1.307 (8) | O2—C13   | 1.217 (10) |
| O1—C13A | 1.327 (8) | C13—C14  | 1.484 (10) |
| N1—H1   | 0.84 (3)  | C14—H14A | 0.9700     |



|            |             |               |            |
|------------|-------------|---------------|------------|
| N1—C6      | 1.355 (3)   | C14—H14B      | 0.9700     |
| N1—C7      | 1.367 (3)   | C14—C15       | 1.507 (11) |
| N2—H2      | 0.96 (3)    | C15—H15A      | 0.9600     |
| N2—C10     | 1.502 (2)   | C15—H15B      | 0.9600     |
| N2—C11     | 1.478 (3)   | C15—H15C      | 0.9600     |
| N2—C12     | 1.479 (3)   | O2A—C13A      | 1.218 (11) |
| C1—C2      | 1.396 (3)   | C13A—C14A     | 1.488 (11) |
| C1—C6      | 1.416 (3)   | C14A—H14C     | 0.9700     |
| C1—C8      | 1.433 (3)   | C14A—H14D     | 0.9700     |
| C2—C3      | 1.375 (3)   | C14A—C15A     | 1.500 (11) |
| C3—H3      | 0.9300      | C15A—H15D     | 0.9600     |
| C3—C4      | 1.386 (4)   | C15A—H15E     | 0.9600     |
| C4—H4      | 0.9300      | C15A—H15F     | 0.9600     |
| C4—C5      | 1.357 (4)   | O3—C16        | 1.272 (2)  |
| C5—H5      | 0.9300      | O4—C16        | 1.219 (2)  |
| C5—C6      | 1.398 (3)   | O5—C19        | 1.181 (3)  |
| C7—H7      | 0.9300      | O6—H6         | 0.894 (10) |
| C7—C8      | 1.364 (3)   | O6—C19        | 1.322 (3)  |
| C8—C9      | 1.505 (3)   | C16—C17       | 1.524 (4)  |
| C9—H9A     | 0.9700      | C16—C17A      | 1.561 (15) |
| C9—H9B     | 0.9700      | C19—C18       | 1.492 (4)  |
| C9—C10     | 1.514 (3)   | C19—C18A      | 1.673 (13) |
| C10—H10A   | 0.9700      | C17—H17       | 0.9300     |
| C10—H10B   | 0.9700      | C17—C18       | 1.286 (5)  |
| C11—H11A   | 0.9600      | C18—H18       | 0.9300     |
| C11—H11B   | 0.9600      | C17A—H17A     | 0.9300     |
| C11—H11C   | 0.9600      | C17A—C18A     | 1.283 (18) |
| C12—H12A   | 0.9600      | C18A—H18A     | 0.9300     |
| C12—H12B   | 0.9600      |               |            |
|            |             |               |            |
| C13—O1—C2  | 120.2 (5)   | H12A—C12—H12B | 109.5      |
| C13A—O1—C2 | 121.3 (5)   | H12A—C12—H12C | 109.5      |
| C6—N1—H1   | 127.2 (18)  | H12B—C12—H12C | 109.5      |
| C6—N1—C7   | 109.00 (19) | O1—C13—C14    | 111.8 (8)  |
| C7—N1—H1   | 123.7 (18)  | O2—C13—O1     | 122.2 (9)  |

|            |             |                |             |
|------------|-------------|----------------|-------------|
| C10—N2—H2  | 107.2 (14)  | O2—C13—C14     | 124.7 (10)  |
| C11—N2—H2  | 106.7 (14)  | C13—C14—H14A   | 109.9       |
| C11—N2—C10 | 112.78 (17) | C13—C14—H14B   | 109.9       |
| C11—N2—C12 | 111.50 (19) | C13—C14—C15    | 109.1 (11)  |
| C12—N2—H2  | 105.3 (14)  | H14A—C14—H14B  | 108.3       |
| C12—N2—C10 | 112.83 (16) | C15—C14—H14A   | 109.9       |
| C2—C1—C6   | 117.03 (19) | C15—C14—H14B   | 109.9       |
| C2—C1—C8   | 136.40 (19) | C14—C15—H15A   | 109.5       |
| C6—C1—C8   | 106.57 (18) | C14—C15—H15B   | 109.5       |
| C1—C2—O1   | 116.91 (18) | C14—C15—H15C   | 109.5       |
| C3—C2—O1   | 122.3 (2)   | H15A—C15—H15B  | 109.5       |
| C3—C2—C1   | 120.6 (2)   | H15A—C15—H15C  | 109.5       |
| C2—C3—H3   | 119.8       | H15B—C15—H15C  | 109.5       |
| C2—C3—C4   | 120.3 (3)   | O1—C13A—C14A   | 113.8 (8)   |
| C4—C3—H3   | 119.8       | O2A—C13A—O1    | 118.8 (11)  |
| C3—C4—H4   | 119.1       | O2A—C13A—C14A  | 125.2 (10)  |
| C5—C4—C3   | 121.9 (2)   | C13A—C14A—H14C | 106.6       |
| C5—C4—H4   | 119.1       | C13A—C14A—H14D | 106.6       |
| C4—C5—H5   | 121.1       | C13A—C14A—C15A | 122.9 (16)  |
| C4—C5—C6   | 117.8 (3)   | H14C—C14A—H14D | 106.6       |
| C6—C5—H5   | 121.1       | C15A—C14A—H14C | 106.6       |
| N1—C6—C1   | 107.88 (18) | C15A—C14A—H14D | 106.6       |
| N1—C6—C5   | 129.9 (2)   | C14A—C15A—H15D | 109.5       |
| C5—C6—C1   | 122.3 (2)   | C14A—C15A—H15E | 109.5       |
| N1—C7—H7   | 124.8       | C14A—C15A—H15F | 109.5       |
| C8—C7—N1   | 110.4 (2)   | H15D—C15A—H15E | 109.5       |
| C8—C7—H7   | 124.8       | H15D—C15A—H15F | 109.5       |
| C1—C8—C9   | 128.71 (18) | H15E—C15A—H15F | 109.5       |
| C7—C8—C1   | 106.12 (17) | C19—O6—H6      | 110 (2)     |
| C7—C8—C9   | 125.07 (18) | O3—C16—C17     | 121.3 (2)   |
| C8—C9—H9A  | 109.8       | O3—C16—C17A    | 91.4 (6)    |
| C8—C9—H9B  | 109.8       | O4—C16—O3      | 123.47 (18) |
| C8—C9—C10  | 109.36 (15) | O4—C16—C17     | 115.3 (2)   |
| H9A—C9—H9B | 108.3       | O4—C16—C17A    | 144.0 (5)   |
| C10—C9—H9A | 109.8       | O5—C19—O6      | 123.5 (2)   |

|                       |              |                        |              |
|-----------------------|--------------|------------------------|--------------|
| C10—C9—H9B            | 109.8        | O5—C19—C18             | 119.8 (2)    |
| N2—C10—C9             | 115.54 (16)  | O5—C19—C18A            | 153.3 (5)    |
| N2—C10—H10A           | 108.4        | O6—C19—C18             | 116.7 (2)    |
| N2—C10—H10B           | 108.4        | O6—C19—C18A            | 81.7 (5)     |
| C9—C10—H10A           | 108.4        | C16—C17—H17            | 118.3        |
| C9—C10—H10B           | 108.4        | C18—C17—C16            | 123.3 (4)    |
| H10A—C10—H10B         | 107.5        | C18—C17—H17            | 118.3        |
| N2—C11—H11A           | 109.5        | C19—C18—H18            | 117.0        |
| N2—C11—H11B           | 109.5        | C17—C18—C19            | 125.9 (3)    |
| N2—C11—H11C           | 109.5        | C17—C18—H18            | 117.0        |
| H11A—C11—H11B         | 109.5        | C16—C17A—H17A          | 122.0        |
| H11A—C11—H11C         | 109.5        | C18A—C17A—C16          | 116.1 (14)   |
| H11B—C11—H11C         | 109.5        | C18A—C17A—H17A         | 122.0        |
| N2—C12—H12A           | 109.5        | C19—C18A—H18A          | 125.8        |
| N2—C12—H12B           | 109.5        | C17A—C18A—C19          | 108.4 (12)   |
| N2—C12—H12C           | 109.5        | C17A—C18A—H18A         | 125.8        |
|                       |              |                        |              |
| O1—C2—C3—C4           | 174.8 (2)    | C7—N1—C6—C5            | 179.3 (2)    |
| O1—C13—C14—C15        | -168.1 (13)  | C7—C8—C9—C10           | -79.5 (2)    |
| O1—C13A—C14A—<br>C15A | -161.9 (17)  | C8—C1—C2—O1            | 4.8 (3)      |
| N1—C7—C8—C1           | 0.6 (2)      | C8—C1—C2—C3            | -179.8 (2)   |
| N1—C7—C8—C9           | 177.28 (17)  | C8—C1—C6—N1            | 0.8 (2)      |
| C1—C2—C3—C4           | -0.3 (4)     | C8—C1—C6—C5            | -178.96 (19) |
| C1—C8—C9—C10          | 96.5 (2)     | C8—C9—C10—N2           | -176.14 (17) |
| C2—O1—C13—O2          | 21.1 (19)    | C11—N2—C10—C9          | 65.0 (2)     |
| C2—O1—C13—C14         | -171.8 (7)   | C12—N2—C10—C9          | -62.5 (3)    |
| C2—O1—C13A—O2A        | -15.9 (19)   | O2—C13—C14—C15         | -1 (2)       |
| C2—O1—C13A—C14A       | -179.6 (9)   | C13—O1—C2—C1           | -128.1 (7)   |
| C2—C1—C6—N1           | -178.69 (17) | C13—O1—C2—C3           | 56.6 (8)     |
| C2—C1—C6—C5           | 1.6 (3)      | O2A—C13A—C14A—<br>C15A | 36 (3)       |
| C2—C1—C8—C7           | 178.5 (2)    | C13A—O1—C2—C1          | -132.2 (7)   |
| C2—C1—C8—C9           | 1.9 (4)      | C13A—O1—C2—C3          | 52.6 (8)     |
| C2—C3—C4—C5           | 0.2 (4)      | O3—C16—C17—C18         | -13.5 (4)    |

|             |              |                   |            |
|-------------|--------------|-------------------|------------|
| C3—C4—C5—C6 | 0.8 (4)      | O3—C16—C17A—C18A  | 172.5 (11) |
| C4—C5—C6—N1 | 178.6 (2)    | O4—C16—C17—C18    | 167.2 (3)  |
| C4—C5—C6—C1 | -1.7 (3)     | O4—C16—C17A—C18A  | -20.7 (17) |
| C6—N1—C7—C8 | -0.1 (2)     | O5—C19—C18—C17    | 172.5 (3)  |
| C6—C1—C2—O1 | -175.91 (17) | O5—C19—C18A—C17A  | -28.3 (18) |
| C6—C1—C2—C3 | -0.6 (3)     | O6—C19—C18—C17    | -7.6 (4)   |
| C6—C1—C8—C7 | -0.8 (2)     | O6—C19—C18A—C17A  | 169.5 (10) |
| C6—C1—C8—C9 | -177.38 (18) | C16—C17—C18—C19   | -176.3 (2) |
| C7—N1—C6—C1 | -0.5 (2)     | C16—C17A—C18A—C19 | -173.3 (7) |

**Table S11.** Hydrogen-bond geometry (Å, °) for 4-PrO-DMT hydrofumarate

| <i>D</i> —H··· <i>A</i>      | <i>D</i> —H | H··· <i>A</i> | <i>D</i> ··· <i>A</i> | <i>D</i> —H··· <i>A</i> |
|------------------------------|-------------|---------------|-----------------------|-------------------------|
| N1—H1···O4 <sup>i</sup>      | 0.84 (3)    | 2.02 (3)      | 2.810 (2)             | 156 (2)                 |
| N2—H2···O3                   | 0.96 (3)    | 1.82 (3)      | 2.765 (2)             | 167 (2)                 |
| C9—H9A···O1                  | 0.97        | 2.57          | 3.196 (3)             | 122                     |
| C10—H10A···O2 <sup>ii</sup>  | 0.97        | 2.34          | 3.302 (16)            | 171                     |
| C10—H10A···O2A <sup>ii</sup> | 0.97        | 2.23          | 3.147 (9)             | 158                     |
| C10—H10B···O5 <sup>iii</sup> | 0.97        | 2.59          | 3.238 (3)             | 125                     |
| C12—H12B···O4                | 0.96        | 2.56          | 3.283 (3)             | 132                     |
| O6—H6···O3 <sup>iv</sup>     | 0.89 (1)    | 1.71 (1)      | 2.606 (2)             | 176 (3)                 |

Symmetry codes: (i)  $x, y+1, z$ ; (ii)  $-x+1, -y+1, -z+1$ ; (iii)  $-x+1/2, y+1/2, -z+3/2$ ; (iv)  $-x+1/2, y-1/2, -z+3/2$ .

## References

- [1] Bruker (2018) *APEX3, SAINT and SADABS*. Bruker AXS Inc., Madison, Wisconsin, USA.
- [2] Sheldrick, G.M. *Acta Cryst. A* 71 (2015) 3-8.
- [3] Sheldrick, G.M. *Acta Cryst. C* 71 (2015) 3-8.
- [4] Dolomanov, O.V, Bourhis, L.J., Gildea, R.J., Howard, J.A.K., Puschmann, H. *J. Appl. Cryst.* 42 (2009) 339-341.
